# Supplementary material
Source: MDPI journal article supplement (https://www.mdpi.com/2075-4442/10/1/12)
Supplement: s1 [file s1]

### Supplementary material S1

The following non-dimensional parameters are used in this work.

$$X = \frac{x}{l}, Y = \frac{y}{l}, H = \frac{h}{l}, P = \frac{P}{E'}, \bar{\eta} = \frac{\eta}{\eta_0}, \bar{\rho} = \frac{\rho}{\rho_0} \quad (1)$$

Where  $l$  is the length of the solution domain in  $x$  direction,  $E'$  is the equivalent Young's modulus.  $\eta_0$  and  $\rho_0$  are the ambient viscosity and density of the lubricant. The non-dimensional equations are as follows.

Non-dimensional Reynolds equation and the boundary condition at micro meshes:

$$\frac{\partial}{\partial X} \left( \epsilon_x \frac{\partial P}{\partial X} \right) + \frac{\partial}{\partial Y} \left( \epsilon_y \frac{\partial P}{\partial Y} \right) = \frac{\partial (\bar{\rho} H)}{\partial X} \quad (2a)$$

where,

$$\epsilon_x = \epsilon_y = \frac{lE'}{12\eta_0 U} \frac{\bar{\rho} H^3}{\bar{\eta}} \quad (2b)$$

$$P(X_0, Y) = P(X_e, Y) = P(X, Y_0) = P(X, Y_e) = \frac{P_0}{E'} \quad (2c)$$

The non-dimensional film thickness equation is

$$\begin{aligned} H(X, Y) &= \frac{1}{l} [h_0 + \delta_1(x, y) + \delta_2(x, y) + v(x, y)] \\ &= H_0 + \bar{\delta}_1(X, Y) + \bar{\delta}_2(X, Y) + V(X, Y) \end{aligned} \quad (3)$$

And the non-dimensional elastic deformation equation is

$$V = \frac{2}{\pi} \iint_{\Omega} \frac{P(\xi, \zeta)}{\sqrt{(X - \xi)^2 + (Y - \zeta)^2}} d\xi d\zeta \quad (4)$$

The non-dimensional viscosity-pressure and density-pressure functions are

$$\bar{\eta} = \exp(\alpha E' P) \quad (5)$$

$$\bar{\rho} = 1 + \frac{0.6 E' P}{1 + 1.7 E' P} \quad (6)$$

Finally, the non-dimensional load balance equation is

$$W = \frac{w}{E' l^2} = \frac{1}{E' l^2} \iint_{\Omega} p(x, y) dx dy = \iint_{\Omega} P(X, Y) dX dY \quad (7)$$

The solution domain for micro meshes is  $\{(X, Y) | 0 \leq X \leq 1, 0 \leq Y \leq 1\}$ .  $\Delta X$  and  $\Delta Y$  are the grid space in  $X$  and  $Y$  directions, respectively, and  $\Delta X = \Delta Y$ .  $i$  and  $j$  represent the nodes in  $X$  and  $Y$ , respectively. The density of grids is  $M \times N$ .

The discrete Eq(2a) is given as follows,

$$\begin{aligned}
& \frac{1}{\Delta X^2} \left[ \varepsilon_{i-1/2,j}^x P_{i-1,j} - \left( \varepsilon_{i-1/2,j}^x + \varepsilon_{i+1/2,j}^x \right) P_{i,j} + \varepsilon_{i+1/2,j}^x P_{i+1,j} \right] \\
& + \frac{1}{\Delta Y^2} \left[ \varepsilon_{i,j-1/2}^y P_{i,j-1} - \left( \varepsilon_{i,j-1/2}^y + \varepsilon_{i,j+1/2}^y \right) P_{i,j} + \varepsilon_{i,j+1/2}^y P_{i,j+1} \right] \\
& = \frac{(\bar{\rho}_{ij} - \bar{\rho}_{i-1,j}) H_{ij}}{\Delta X} + \frac{\bar{\rho}_{ij} (H_{ij} - H_{i-1,j})}{\Delta Y}
\end{aligned} \tag{8}$$

The discrete film thickness equation is

$$H_{ij} = H_0 + \bar{\delta}_{1i,j} + \bar{\delta}_{2i,j} + V_{i,j} \tag{9}$$

In order to discretize the non-dimensional elastic deformation equation Eq(4), Liu et al. [1] used parabolic-elliptic interpolation function to estimate the pressure distribution in one micro mesh element, and then utilized the interpolation function to discretize Eq(4) which turns into Eq(10).

$$V_{i,j} = \sum_{k=1}^{M-1} \sum_{l=1}^{N-1} D_{k,l}^{i,j} P_{k,l} \tag{10}$$

where  $D$  is the elastic deformation coefficient matrix, and it is only determined based on the specific micro meshes.

Based on the same interpolation function of pressure distribution, the non-dimensional load balance equation is given in Eq(11).

$$W = \sum_{i=1}^m \sum_{j=1}^n e_{i,j} P_{i,j} \tag{11}$$

where  $e$  is also the coefficient matrix. The calculation of  $D$  and  $e$  is given in work[1]. Eq(8) can be reformatted to Eq(12).

$$\alpha_{i,j}^{(s)} P_{i-1,j}^{(s+1)} + \beta_{i,j}^{(s)} P_{i,j}^{(s+1)} + \gamma_{i,j}^{(s)} P_{i+1,j}^{(s+1)} = b_{i,j}^{(s)} \tag{12}$$

where the superscript (s) means the (s)th iteration step, as the  $\Delta X = \Delta Y$ ,

$$\alpha_{i,j}^{(s)} = \varepsilon_{i-1/2,j}^{x(s)} \tag{13a}$$

$$\beta_{i,j}^{(s)} = - \left( \varepsilon_{i-1/2,j}^{x(s)} + \varepsilon_{i+1/2,j}^{x(s)} + \varepsilon_{i,j-1/2}^{y(s)} + \varepsilon_{i,j+1/2}^{y(s)} \right) \tag{13b}$$

$$\gamma_{i,j}^{(s)} = \varepsilon_{i+1/2,j}^{x(s)} \tag{13c}$$

$$b_{i,j}^{(s)} = - \left( \varepsilon_{i,j-1/2}^{y(s)} P_{i,j-1}^{(s)} + \varepsilon_{i,j+1/2}^{y(s)} P_{i,j+1}^{(s)} \right) + \Delta X \left[ \left( \bar{\rho}_{ij}^{(s)} - \bar{\rho}_{i-1,j}^{(s)} \right) H_{ij}^{(s)} + \bar{\rho}_{ij}^{(s)} \left( H_{ij}^{(s)} - H_{i-1,j}^{(s)} \right) \right] \tag{13d}$$

To a given  $j$ , the coefficient matrix of Eq(12) is tridiagonal. Thus chasing method can be used to solve the corresponding linear equation set.

However, when  $h \rightarrow 0$ ,

$$\alpha_{i,j}^{(s)} = \varepsilon_{i-1/2,j}^{x(s)} \xrightarrow{h \rightarrow 0} 0 \tag{14a}$$

$$\beta_{i,j}^{(s)} = -\left(\varepsilon_{i-1/2,j}^{x(s)} + \varepsilon_{i+1/2,j}^{x(s)} + \varepsilon_{i,j-1/2}^{y(s)} + \varepsilon_{i,j+1/2}^{y(s)}\right) \xrightarrow{h \rightarrow 0} 0 \quad (14b)$$

$$\gamma_{i,j}^{(s)} = \varepsilon_{i+1/2,j}^{x(s)} \xrightarrow{h \rightarrow 0} 0 \quad (14c)$$

Therefore, the coefficient matrix of Eq(12) will lose its diagonal dominance. This is the reason why it is hard to get a converged solution under ultrathin lubricant film. Zhu and Hu [2, 3] utilized the elastic deformation equation Eq(10) to solve this problem. They transpose the RHS terms involving the unknown pressures in Eq(12),  $P_{i-1,j}^{(s+1)}$ ,

$P_{i,j}^{(s+1)}$ , and  $P_{i+1,j}^{(s+1)}$  to the left. In this manner, Eq(13) turns to follow

$$\alpha_{i,j}^{(s)} = \varepsilon_{i-1/2,j}^{x(s)} - \left(\bar{\rho}_{i,j}^{(s)} D_{i-1,j}^{i,j} - \bar{\rho}_{i-1,j}^{(s)} D_{i-1,j}^{i,j}\right) \Delta X - \left(\bar{\rho}_{i,j}^{(s)} D_{i-1,j}^{i,j} - \bar{\rho}_{i,j}^{(s)} D_{i-1,j}^{i-1,j}\right) \Delta X \quad (15a)$$

$$\beta_{i,j}^{(s)} = -\left(\varepsilon_{i-1/2,j}^{x(s)} + \varepsilon_{i+1/2,j}^{x(s)} + \varepsilon_{i,j-1/2}^{y(s)} + \varepsilon_{i,j+1/2}^{y(s)}\right) - \left(\bar{\rho}_{i,j}^{(s)} D_{i,j}^{i,j} - \bar{\rho}_{i,j}^{(s)} D_{i,j}^{i-1,j}\right) \Delta X \quad (15b)$$

$$\gamma_{i,j}^{(s)} = \varepsilon_{i+1/2,j}^{x(s)} - \left(\bar{\rho}_{ij}^{(s)} D_{i+1,j}^{i,j} - \bar{\rho}_{i-1,j}^{(s)} D_{i+1,j}^{i,j}\right) \Delta X - \left(\bar{\rho}_{ij}^{(s)} D_{i+1,j}^{i,j} - \bar{\rho}_{ij}^{(s)} D_{i+1,j}^{i-1,j}\right) \Delta X \quad (15c)$$

$$b_{i,j}^{(s)} = -\left(\varepsilon_{i,j-1/2}^{y(s)} P_{i,j-1}^{(s)} + \varepsilon_{i,j+1/2}^{y(s)} P_{i,j+1}^{(s)}\right) + f_1 + f_2 \quad (15d)$$

where,

$$f_1 = \Delta X \left[ \bar{\rho}_{ij}^{(s)} \left( H_{ij}^{(s)} - H_{i-1,j}^{(s)} \right) - \left( \bar{\rho}_{i,j}^{(s)} D_{i,j}^{i,j} - \bar{\rho}_{i,j}^{(s)} D_{i,j}^{i-1,j} \right) P_{ij}^{(s)} \right. \\ \left. - \left( \bar{\rho}_{i,j}^{(s)} D_{i-1,j}^{i,j} - \bar{\rho}_{i-1,j}^{(s)} D_{i-1,j}^{i,j} \right) P_{i-1,j}^{(s)} - \left( \bar{\rho}_{i,j}^{(s)} D_{i-1,j}^{i,j} - \bar{\rho}_{i,j}^{(s)} D_{i-1,j}^{i-1,j} \right) P_{i-1,j}^{(s)} \right]$$

$$f_2 = \Delta X \left[ H_{ij}^{(s)} \left( \bar{\rho}_{ij}^{(s)} - \bar{\rho}_{i-1,j}^{(s)} \right) - \left( \bar{\rho}_{i,j}^{(s)} D_{i,j}^{i,j} - \bar{\rho}_{i-1,j}^{(s)} D_{i,j}^{i,j} \right) P_{ij}^{(s)} \right. \\ \left. - \left( \bar{\rho}_{ij}^{(s)} D_{i+1,j}^{i,j} - \bar{\rho}_{i-1,j}^{(s)} D_{i+1,j}^{i,j} \right) P_{i+1,j}^{(s)} - \left( \bar{\rho}_{ij}^{(s)} D_{i+1,j}^{i,j} - \bar{\rho}_{ij}^{(s)} D_{i+1,j}^{i-1,j} \right) P_{i+1,j}^{(s)} \right]$$

Because element  $D_{k,j}^{l,j}$  has the maximum value when  $k = l$ , following inequality always holds,

$$|\beta_{i,j}^{(s)}| > |\alpha_{i,j}^{(s)}| + |\gamma_{i,j}^{(s)}| \quad (16)$$

which means that the coefficient matrix of Eq(13) keeps diagonal dominance even under ultrathin lubricant film.

Eq(12) is solved iteratively by under relaxation method, the equation is

$$P_{new} = P_{old} + \omega(P - P_{old}) \quad (17)$$

where  $\omega$  is the under-relaxation factor, which is smaller than one, and  $P_{new}$  is the pressure distribution values for the next iteration step.

The convergent criterion for pressure distribution

$$\frac{\sum \sum |P - P_{old}|}{\sum \sum |P_{old}|} \leq \varepsilon_p \quad (18)$$

Where  $P$  is the newest pressure distribution,  $P_{old}$  is the pressure distribution obtained in the last iteration loop, and  $\varepsilon_p$  is a constant which is equal to  $1 \times 10^{-5}$  in this paper.

The convergent criterion for load capacity is

$$\frac{\sum \sum |W_{cal} - W|}{\sum \sum |W|} \leq \varepsilon_w \quad (19)$$

where  $W_{cal}$  is the calculated load capacity,  $W$  is the applied load, and  $\varepsilon_w$  is a constant which equals to  $1 \times 10^{-5}$  in this paper.

#### Reference

1. Liu, S.B., J.J. Ma, and Y.X. Chen, *Elliptic-Paraboloid Method for Calculating Surface Elastic-Deformation in Ehl*. Tribology International, 1993. **26**(6): p. 443-448.
2. Hu, Y.Z. and D. Zhu, *A full numerical solution to the mixed lubrication in point contacts*. JOURNAL OF TRIBOLOGY-TRANSACTIONS OF THE ASME, 2000. **122**(1): p. 1-9.
3. Zhu, D. and Y.-Z. Hu, *The study of transition from elastohydrodynamic to mixed and boundary lubrication*. The advancing frontier of engineering tribology, Proceedings of the 1999 STLE/ASME HS Cheng Tribology Surveillance, 1999: p. 150-156.
